# Supplementary material
Source: MDPI journal article supplement (https://www.mdpi.com/2673-4931/25/1/1)
Supplement: s1 [file s1]

Table S1: Results of FFBPNN for Yerli station

| <b>Transfer Function</b> | <b>Network Architecture</b> | <b>Number of Neurons</b> | <b>MSE</b> | <b>RMSE</b> | <b>R</b> |
|--------------------------|-----------------------------|--------------------------|------------|-------------|----------|
| Transig                  | 6-2-1                       | 10                       | 0.7905     | 0.8891      | 0.94204  |
| Transig                  | 6-3-1                       | 10                       | 0.6872     | 0.8289      | 0.91321  |
| Transig                  | 6-4-1                       | 10                       | 0.6618     | 0.8135      | 0.92072  |
| Transig                  | 6-2-1                       | 20                       | 0.6028     | 0.7764      | 0.94418  |
| Transig                  | 6-3-1                       | 20                       | 0.5750     | 0.7582      | 0.93744  |
| Transig                  | 6-4-1                       | 20                       | 0.4982     | 0.7056      | 0.96213  |
| Logsig                   | 6-2-1                       | 10                       | 1.2126     | 1.1011      | 0.94575  |
| Logsig                   | 6-3-1                       | 10                       | 1.0872     | 1.0426      | 0.91362  |
| Logsig                   | 6-4-1                       | 10                       | 0.9861     | 0.9930      | 0.83050  |
| Logsig                   | 6-2-1                       | 20                       | 0.9812     | 0.9905      | 0.93820  |
| Logsig                   | 6-3-1                       | 20                       | 0.9794     | 0.9896      | 0.94116  |
| Logsig                   | 6-4-1                       | 20                       | 0.9713     | 0.9532      | 0.95182  |
| purelin                  | 6-2-1                       | 10                       | 1.3811     | 1.1752      | 0.77560  |
| purelin                  | 6-3-1                       | 10                       | 1.2972     | 1.1389      | 0.81533  |
| purelin                  | 6-4-1                       | 10                       | 1.1988     | 1.0948      | 0.88452  |
| purelin                  | 6-2-1                       | 20                       | 1.1697     | 1.0815      | 0.77055  |
| purelin                  | 6-3-1                       | 20                       | 1.0836     | 1.0409      | 0.86730  |
| purelin                  | 6-4-1                       | 20                       | 0.9891     | 0.9945      | 0.90754  |

Table S2: Results of CFBPNN for Yerli station

| <b>Transfer Function</b> | <b>Network Architecture</b> | <b>Number of Neurons</b> | <b>MSE</b> | <b>RMSE</b> | <b>R</b> |
|--------------------------|-----------------------------|--------------------------|------------|-------------|----------|
| Transig                  | 6-2-1                       | 10                       | 1.6720     | 1.2930      | 0.91317  |
| Transig                  | 6-3-1                       | 10                       | 1.5852     | 1.2590      | 0.91972  |
| Transig                  | 6-4-1                       | 10                       | 1.5169     | 1.2316      | 0.92880  |
| Transig                  | 6-2-1                       | 20                       | 1.4723     | 1.2134      | 0.92438  |
| Transig                  | 6-3-1                       | 20                       | 1.0288     | 1.0142      | 0.94060  |
| Transig                  | 6-4-1                       | 20                       | 0.8813     | 0.9387      | 0.96096  |
| Logsig                   | 6-2-1                       | 10                       | 1.2124     | 1.1010      | 0.92847  |
| Logsig                   | 6-3-1                       | 10                       | 1.0696     | 1.0342      | 0.90271  |
| Logsig                   | 6-4-1                       | 10                       | 0.9713     | 0.9855      | 0.89329  |
| Logsig                   | 6-2-1                       | 20                       | 0.9644     | 0.9829      | 0.90213  |
| Logsig                   | 6-3-1                       | 20                       | 0.9277     | 0.9631      | 0.93750  |
| Logsig                   | 6-4-1                       | 20                       | 0.8904     | 0.9436      | 0.94575  |
| Purelin                  | 6-2-1                       | 10                       | 1.5135     | 1.2302      | 0.76575  |
| Purelin                  | 6-3-1                       | 10                       | 1.3866     | 1.1775      | 0.82150  |
| Purelin                  | 6-4-1                       | 10                       | 1.2052     | 1.0978      | 0.89772  |

|                |       |    |        |        |         |
|----------------|-------|----|--------|--------|---------|
| <b>Purelin</b> | 6-2-1 | 20 | 1.1745 | 1.0837 | 0.76613 |
| <b>Purelin</b> | 6-3-1 | 20 | 1.0289 | 1.0143 | 0.86520 |
| <b>Purelin</b> | 6-4-1 | 20 | 0.9916 | 0.9957 | 0.98270 |

Table S3: Results of NNSTART for Yerli station

| <b>Algorithm</b> | <b>Number of<br/>Neurons</b> | <b>MSE</b> | <b>RMSE</b> | <b>R</b> |
|------------------|------------------------------|------------|-------------|----------|
| <b>LM</b>        | 10                           | 0.9774     | 0.9886      | 0.89887  |
| <b>LM</b>        | 20                           | 0.8557     | 0.9250      | 0.90763  |
| <b>LM</b>        | 30                           | 0.7279     | 0.8531      | 0.95057  |
| <b>BR</b>        | 10                           | 1.1745     | 1.0837      | 0.85428  |
| <b>BR</b>        | 20                           | 0.9669     | 0.9833      | 0.91349  |
| <b>BR</b>        | 30                           | 0.8133     | 0.9018      | 0.92790  |
| <b>CGS</b>       | 10                           | 1.7262     | 1.3138      | 0.91291  |
| <b>CGS</b>       | 20                           | 1.1680     | 1.0807      | 0.92185  |
| <b>CGS</b>       | 30                           | 0.9086     | 0.9532      | 0.94573  |
